# Supplementary material
Source: PubMed Central journal article supplement (PMC3824595)
Supplement: cdd2013129x1.pdf [file cdd2013129x1.pdf]

Supporting Information

**Hsp90 chaperones PPAR $\gamma$  and regulates differentiation and survival  
of 3T3-L1 adipocytes**

Minh Tu Nguyen, Péter Csermely and Csaba Sóti\*

*Department of Medical Chemistry, Semmelweis University, Budapest, Hungary*

\*Corresponding author: C Sóti, Department of Medical Chemistry, Semmelweis University, P.O.Box 260, Budapest, H-1444, Hungary. Tel.: + 36 1 4591500 extn. 60130; Fax: + 36 1 4591500 extn. 60141; E-mail: [soti.csaba@med.semmelweis-univ.hu](mailto:soti.csaba@med.semmelweis-univ.hu)

This file includes: Supplementary Table S1, Supplementary Figures S1 through S7 and Legends.

## Supplementary Table

**Table S1**

**Statistical comparison of IC50 values of geldanamycin treatment**

| Figure | Parameter studied            | Mean IC50 | Mean LogIC50 | SEM LogIC50 | n | p vs. differentiation | p vs. PPAR $\gamma$ 2 protein |
|--------|------------------------------|-----------|--------------|-------------|---|-----------------------|-------------------------------|
| 1      | Differentiation              | 16.38     | 1.214        | 0.080       | 3 | --                    | 0.0908 (ns)                   |
| 1      | Viability                    | 163.60    | 2.214        | 1.111       | 3 | 0.0005 (***)          | 0.0026 (**)                   |
| 1      | Differentiation/viable cells | 20.45     | 1.311        | 0.100       | 3 | 0.0777 (ns)           | 0.3249 (ns)                   |
| 2      | PPAR $\gamma$ 1 protein      | 50.99     | 1.708        | 0.053       | 3 | 0.0413 (*)            | 0.5457 (ns)                   |
| 2      | PPAR $\gamma$ 2 protein      | 40.78     | 1.610        | 0.062       | 3 | 0.0908 (ns)           | --                            |
| 2      | Akt protein                  | 53.74     | 1.730        | 0.094       | 3 | 0.0339 (*)            | 0.3356 (ns)                   |
| 4      | PPAR $\gamma$ 2 mRNA         | 39.06     | 1.592        | 0.103       | 3 | 0.1498 (ns)           | 0.8533 (ns)                   |
| 4      | GLUT4 mRNA                   | 41.93     | 1.622        | 0.113       | 3 | 0.0999 (ns)           | 0.9936 (ns)                   |
| 4      | aP2 mRNA                     | 85.49     | 1.932        | 0.082       | 3 | 0.0096 (**)           | 0.1032 (ns)                   |
| 4      | adiponectin mRNA             | 43.82     | 1.642        | 0.087       | 3 | 0.0688 (ns)           | 0.8044 (ns)                   |

3T3-L1 cells were treated by geldanamycin for 20 hours on day 3 of differentiation. Differentiation and viability were assayed on day 14, all the other parameters were obtained on day 4.

SEM = standard error of the mean

n = number of experiments

p = p value, \*p<0.05, \*\*p<0.01, \*\*\*p<0.001 by two-tailed unpaired *t* test

## Supplementary Figures

### Figure S1

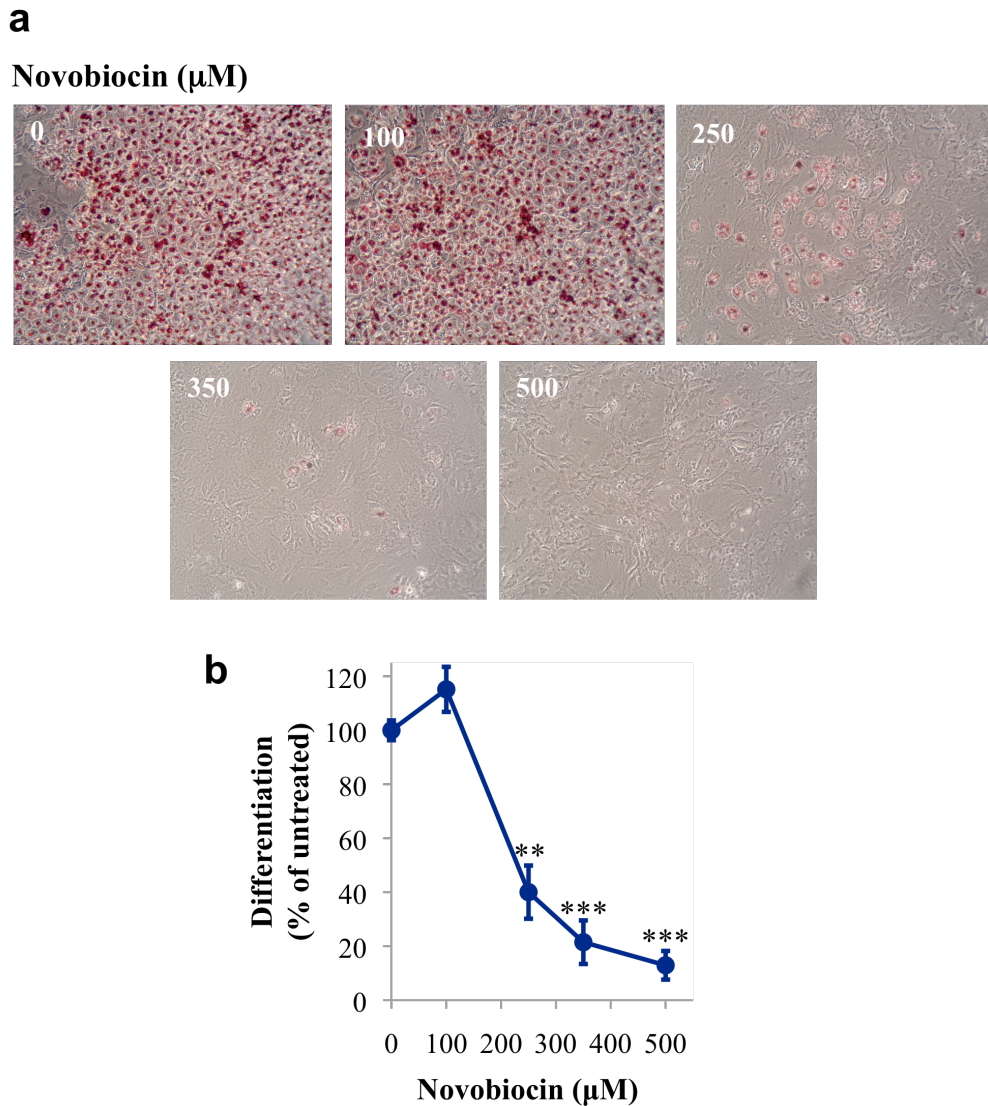

**Figure S1** Novobiocin inhibits adipocyte differentiation. **(a)** Oil Red O staining of 3T3-L1 cells on day 14, treated by various concentrations of novobiocin for 20 hours on day 3. Note the presence of unstained undifferentiated attached preadipocytes in novobiocin-treated samples. Images are representatives of 3 experiments. **(b)** Quantification of Oil Red O absorption. Values are means  $\pm$  SD-s of 3 experiments and statistically compared to the untreated control. \* $p < 0.05$ , \*\* $p < 0.01$ , \*\*\* $p < 0.001$  by two-tailed unpaired  $t$  test.

**Figure S2**

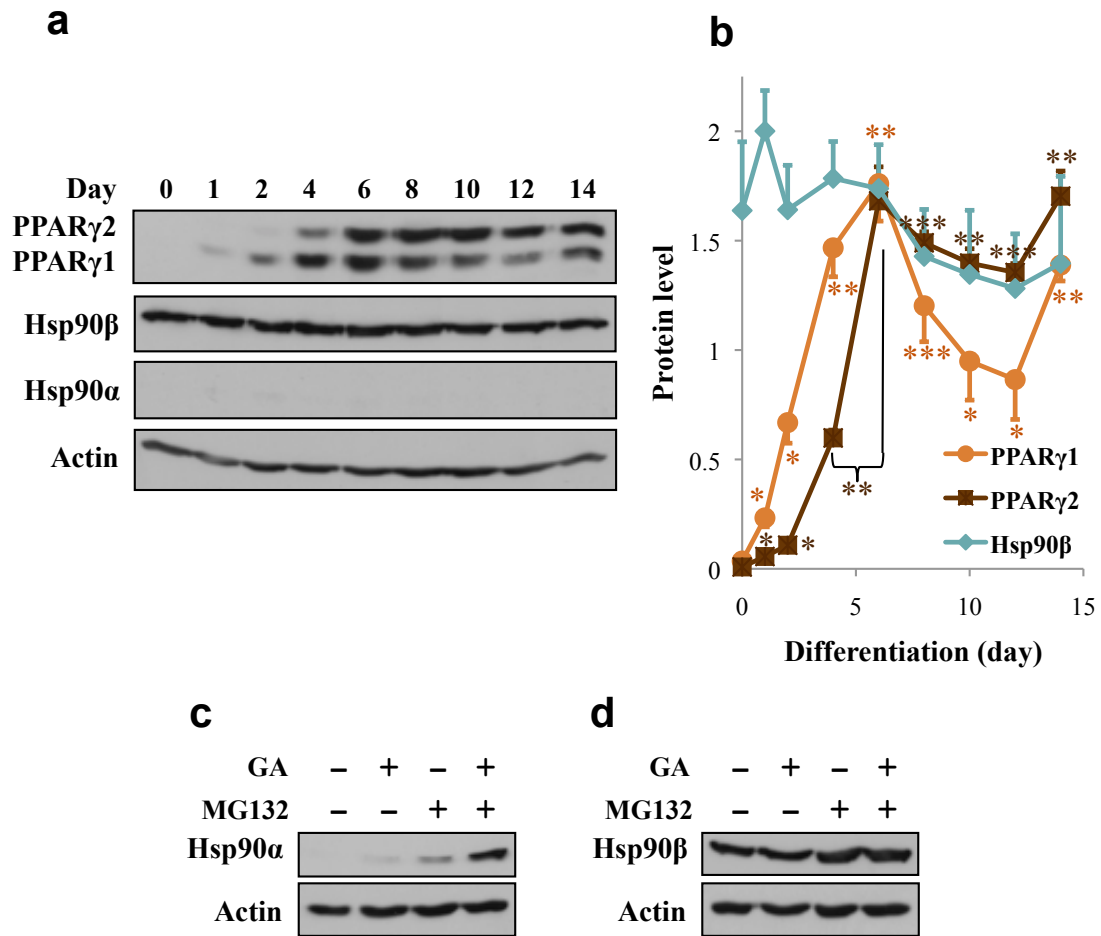

**Figure S2** Expression of PPAR $\gamma$ , Hsp90 $\alpha$  and  $\beta$  in 3T3-L1 cells. **(a)** Western blots showing PPAR $\gamma$ , Hsp90 $\alpha$  and  $\beta$  protein levels during adipogenesis. Images are representatives of 2 independent experiments. **(b)** Densitometric analysis of protein levels shown on panel (a) normalized to  $\beta$ -actin. Values are means  $\pm$  SD-s of 2 experiments and statistically compared to the untreated control. \* $p$ <0.05, \*\* $p$ <0.01, \*\*\* $p$ <0.001 by two-tailed unpaired t test. **(c)** Anti-Hsp90 $\alpha$  and **(d)** anti-Hsp90 $\beta$  Western blots of lysates from cells treated by 446 nM (0.25  $\mu$ g/ml) GA and/or 20  $\mu$ M MG132 for 20 hours on day 3. Images are representatives of 2 independent experiments.

**Figure S3**

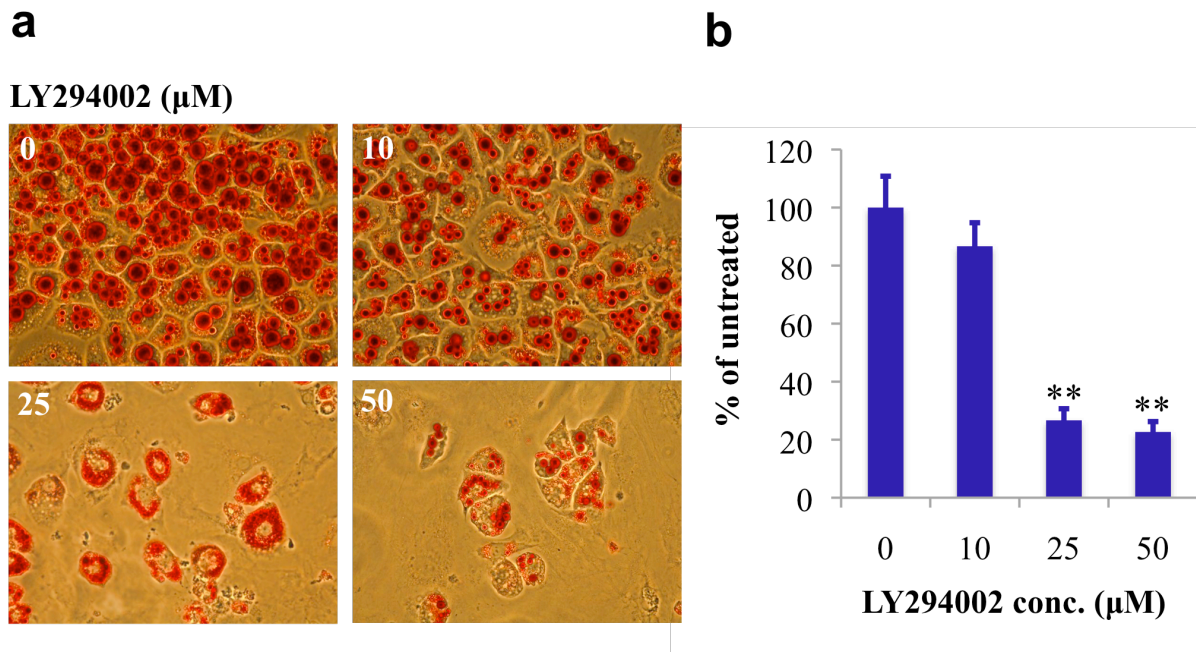

**Figure S3 Phosphatidylinositol-3-kinase inhibition compromises adipogenesis in 3T3-L1 cells.** (a) Oil Red O staining of 3T3-L1 cells on day 14 treated by various concentrations of PI3K inhibitor LY294002 for 20 hours on day 3. Images are representatives of 2 independent experiments. (b) Quantification of Oil Red O absorption by photometry. Values are means  $\pm$  SD-s of 2 experiments and statistically compared to the untreated control. \* $p < 0.05$ , \*\* $p < 0.01$ , \*\*\* $p < 0.001$  by two-tailed unpaired  $t$  test.

**Figure S4**

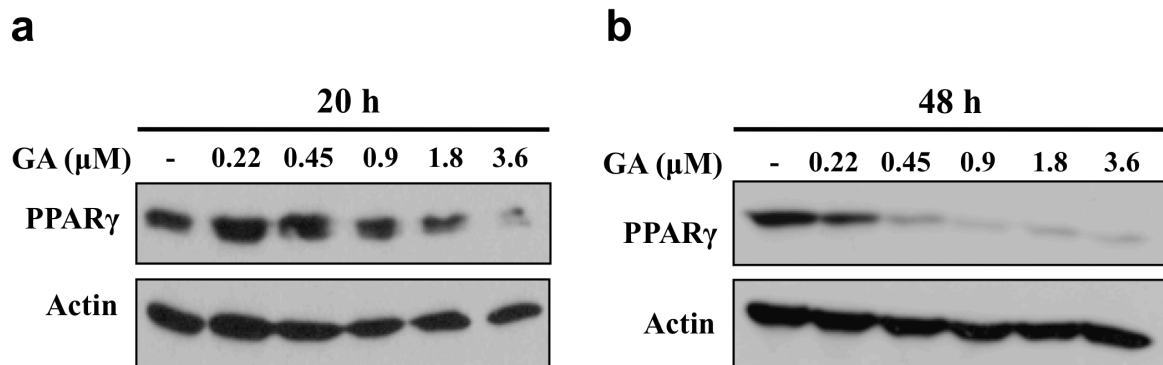

**Figure S4** Hsp90 inhibition depletes PPAR $\gamma$  protein in HepG2 human hepatoma cells. Western blots of lysates from HepG2 cells treated by GA for 20 (a) or 48 (b) hours. Images are representatives of 2 independent experiments.

**Figure S5**

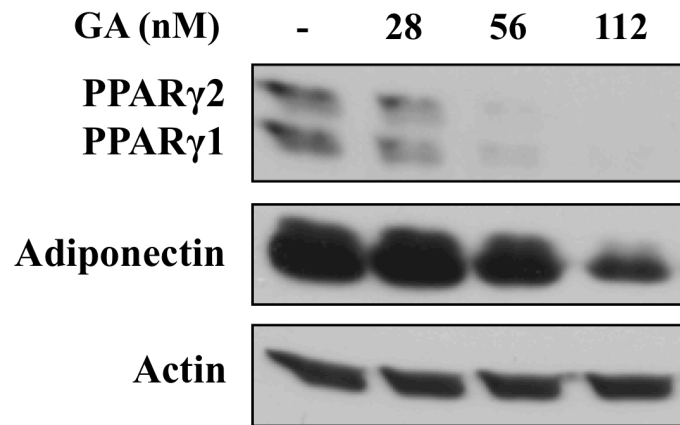

**Figure S5** Geldanamycin treatment down-regulates adiponectin protein in parallel with PPAR $\gamma$  in differentiated 3T3-L1 cells. Western blots of lysates from cells treated by various concentrations of geldanamycin (GA) for 20 hours on day 13. Images are representatives of 2 independent experiments.

Figure S6

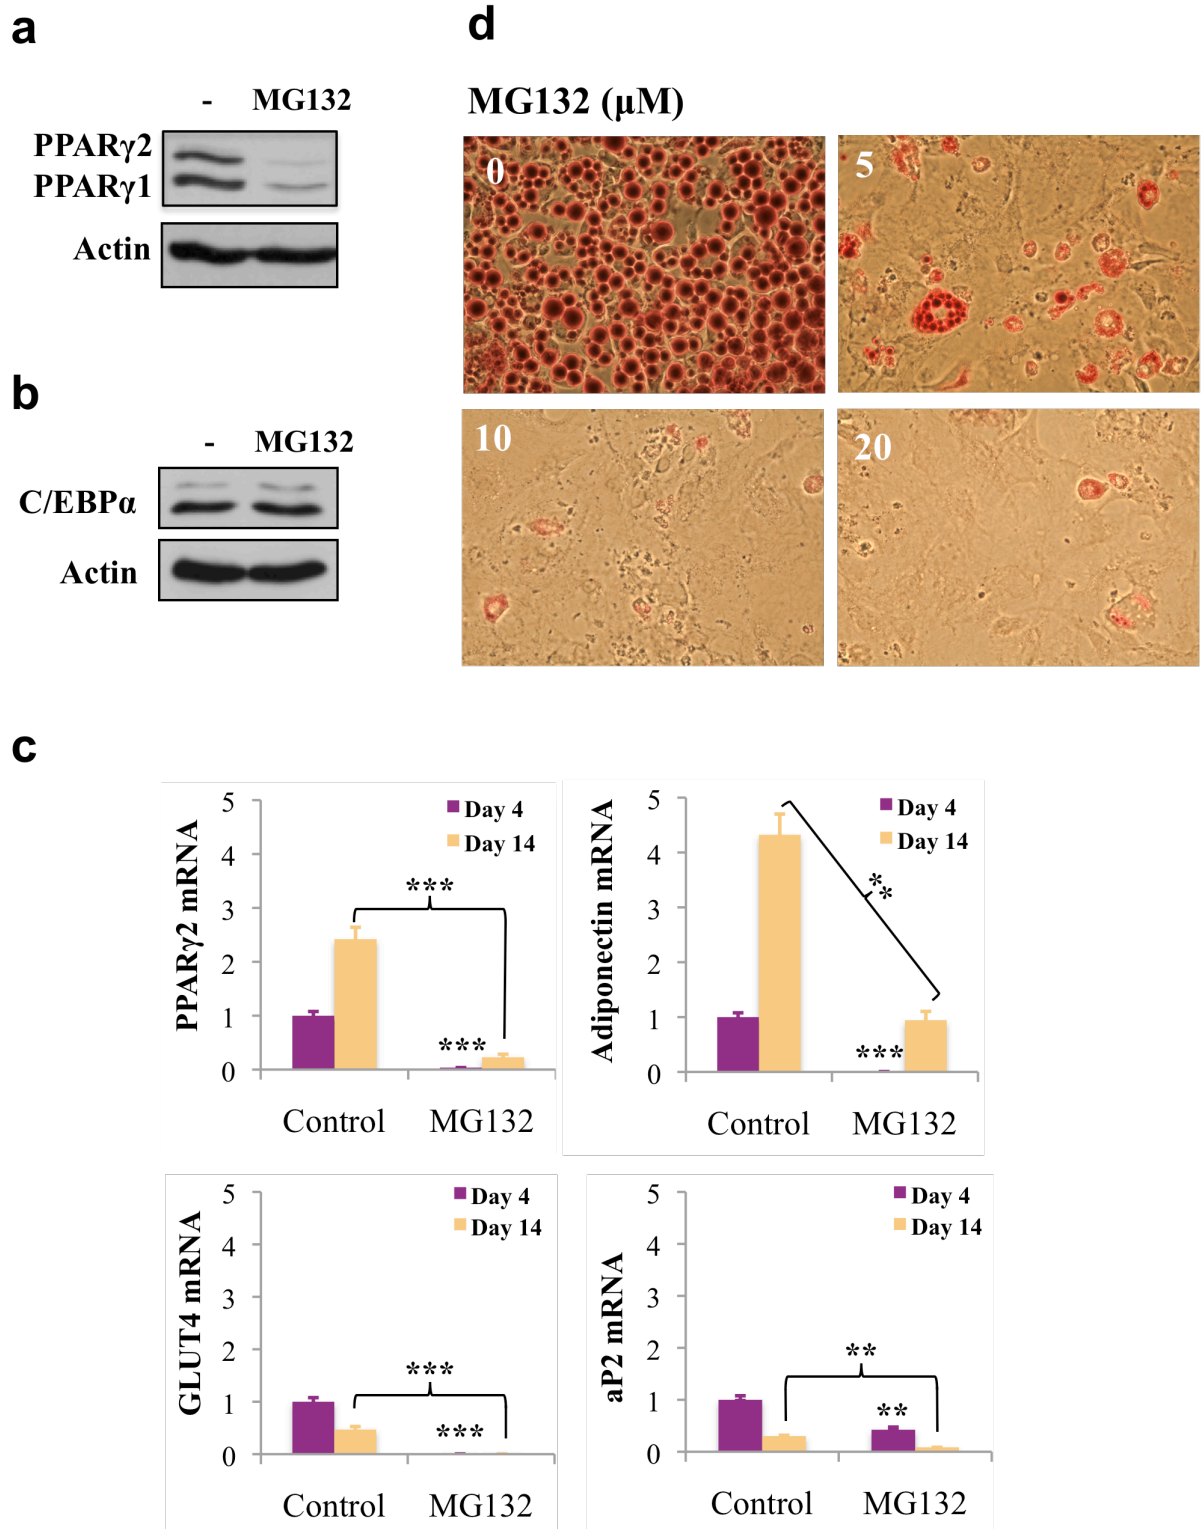



**Figure S6 Proteasome inhibition impairs PPAR $\gamma$  folding, transcriptional output and adipocyte differentiation.** Effect of proteasome inhibition on PPAR $\gamma$  (a) and on C/EBP $\alpha$  p42 (b) protein levels. Western blots of lysates from cells subjected to 5  $\mu$ M MG132 treatment for 20 hours on day 3. (c) Effect of 10  $\mu$ M MG132 treatment on day 3 on PPAR $\gamma$ 2, adiponectin, GLUT4 and aP2 mRNA levels. mRNA expression data assayed by qRT-PCR from cells on day 4 and 14, normalized to 28S rRNA and expressed relative to the respective (day 4 and day 14) untreated controls. Data are means  $\pm$  SD-s of 2 experiments and statistically compared to the respective untreated controls. \* $p$ <0.05, \*\* $p$ <0.01, \*\*\* $p$ <0.001 by two-tailed unpaired  $t$  test. (d) Proteasome inhibition compromises adipocyte differentiation. Oil Red O staining of differentiated cells on day 14 treated by MG132 at the indicated concentrations for 20 hours on day 3. Images are representatives of 3 independent experiments.

**Figure S7**

**a**

**GA (nM)**

**Re-differentiated**

**0**

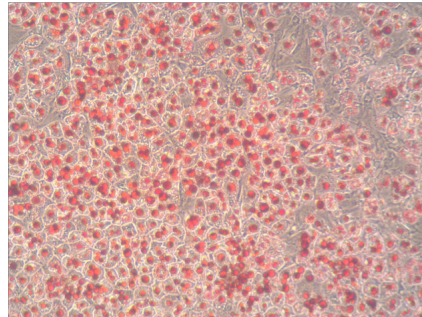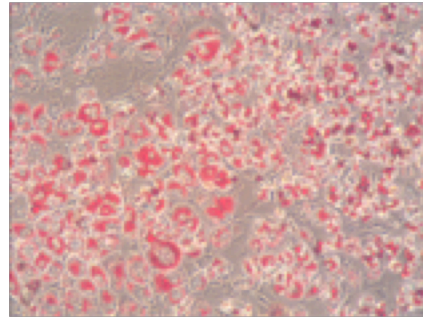

**28**

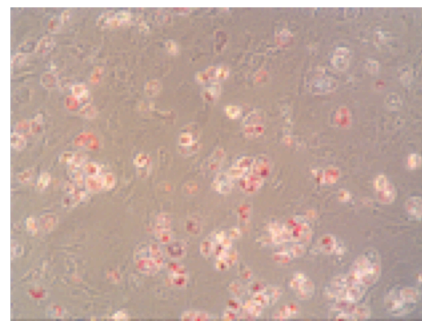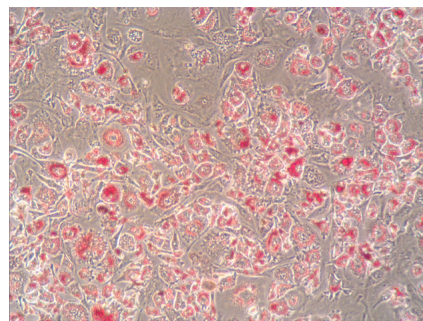

**56**

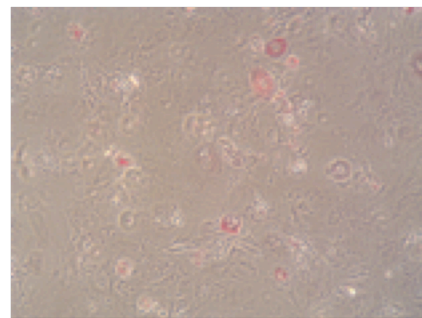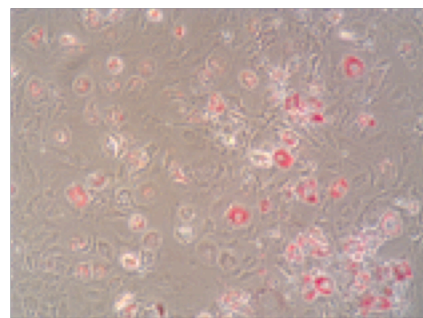

**112**

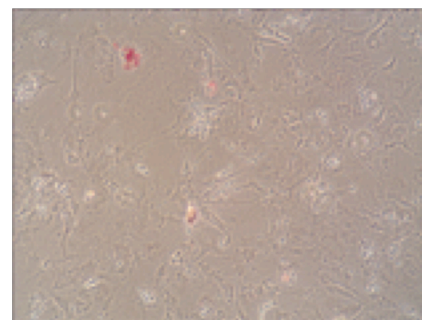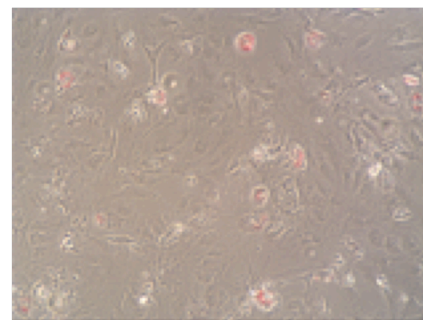

**446**

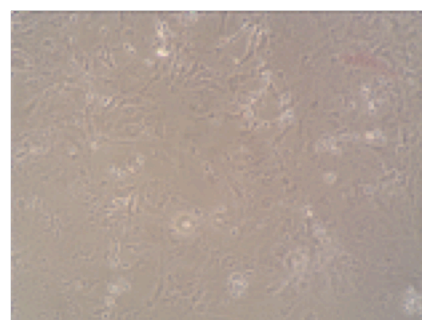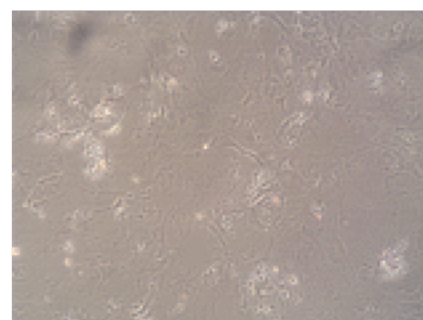

**b**

**HS (min)**

**Re-differentiated**

**0**

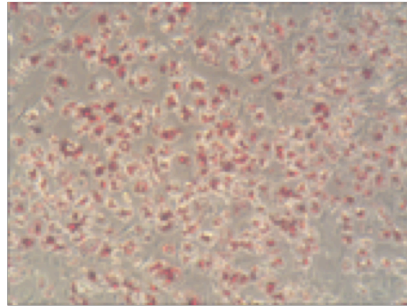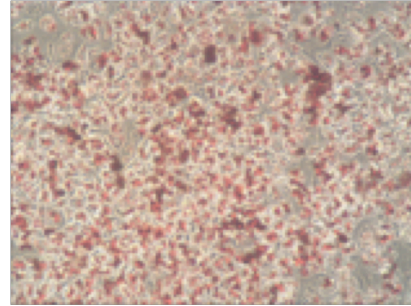

**30**

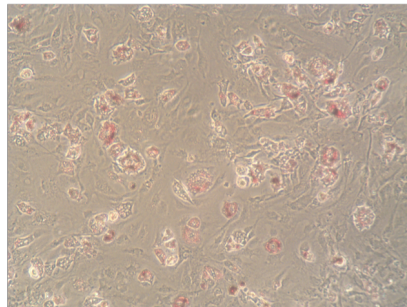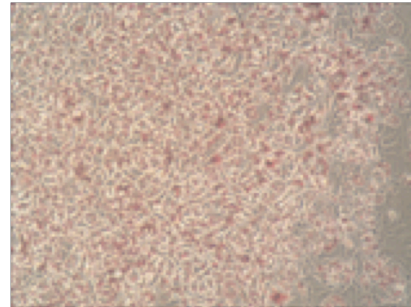

**120**

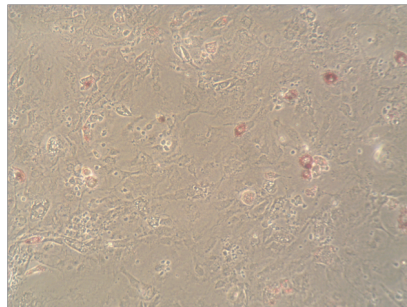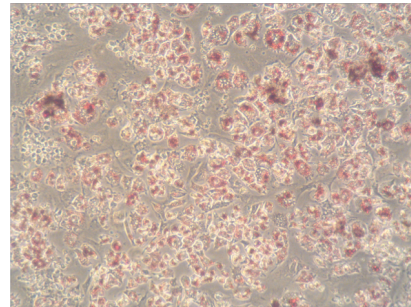

**180**

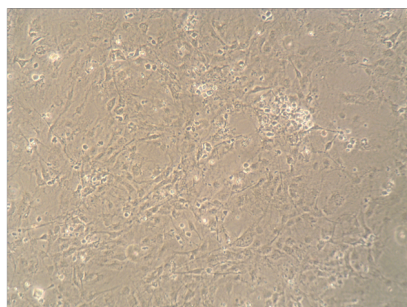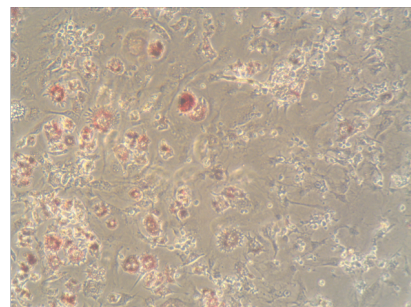

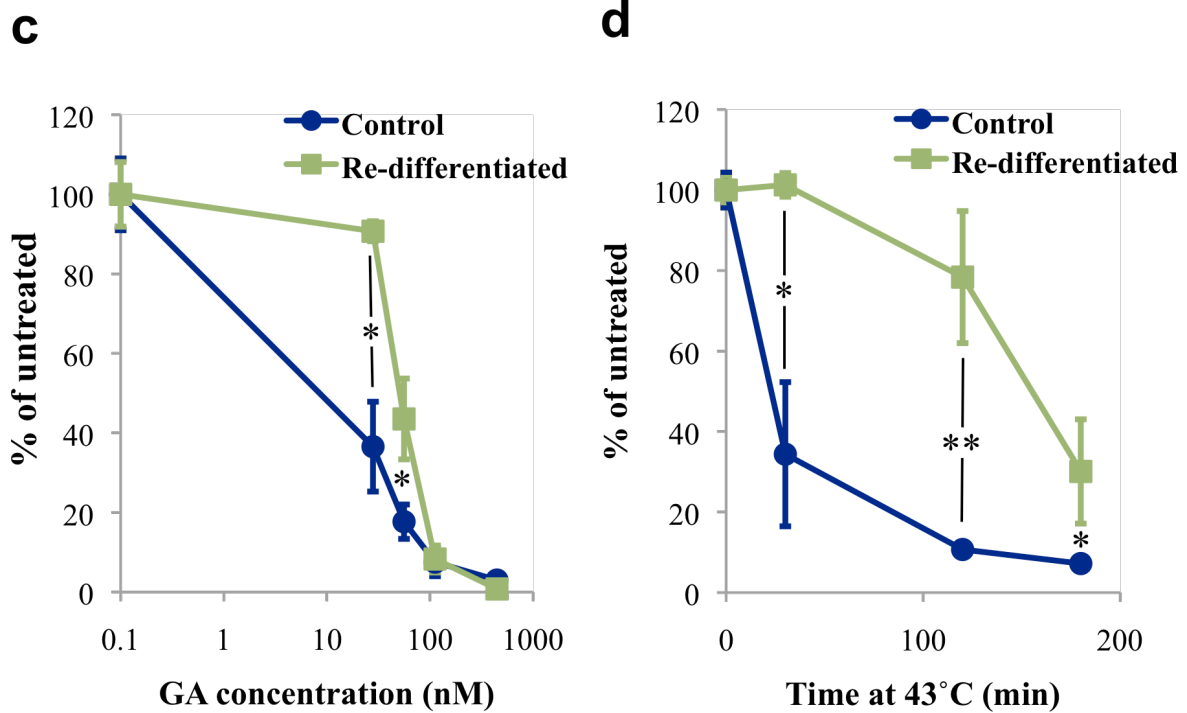

**Figure S7 Effect of geldanamycin and heat shock treatments on the re-differentiation of 3T3-L1 cells. (a)** Oil Red O staining of 3T3-L1 cells on day 14, treated by various concentrations of geldanamycin (GA) for 24 hours on day 3, with or without re-differentiation. Images are representatives of 2 experiments. **(b)** Oil Red O staining of 3T3-L1 cells on day 14, treated by various durations of heat shock (HS) at 43°C on day 3, with or without re-differentiation. Images are representatives of 2 experiments. **(c and d)** Quantification of Oil Red O absorption of viable cells subjected to GA **(c)** or HS **(d)** treatments with or without re-differentiation, from the experiments shown in panel (a) and (b). Values are means  $\pm$  SD-s of 2 experiments, normalized to viability and expressed relative to the respective untreated (control and re-differentiated) samples. Statistical pairwise comparison is made between similar treatments with and without re-differentiation. \* $p < 0.05$ , \*\* $p < 0.01$ , \*\*\* $p < 0.001$  by two-tailed unpaired  $t$  test.
